# Supplementary material
Source: PubMed Central journal article supplement (PMC8633421)
Supplement: mmc1.pdf [file mmc1.pdf]

ONLINE APPENDIX TO  
Global Supply Chains in the Pandemic \*

Barthélemy Bonadio  
University of Michigan

Zhen Huo  
Yale University

Andrei A. Levchenko  
University of Michigan  
NBER and CEPR

Nitya Pandalai-Nayar  
University of Texas at Austin  
and NBER

July 2021

**Contents**

|                                                       |          |
|-------------------------------------------------------|----------|
| <b>A Proof and Additional Derivations</b>             | <b>1</b> |
| A.1 Proof of Proposition 1 . . . . .                  | 1        |
| A.2 Alternative Shock Specification . . . . .         | 3        |
| A.3 Changes in Real Consumption . . . . .             | 4        |
| <b>B Data and Robustness</b>                          | <b>5</b> |
| B.1 Country, Sector, and Occupations Sample . . . . . | 5        |
| B.2 Curving of the Stringency Index . . . . .         | 9        |
| B.3 Additional Results . . . . .                      | 9        |

---

\*Email: [bbonadio@umich.edu](mailto:bbonadio@umich.edu), [zhen.huo@yale.edu](mailto:zhen.huo@yale.edu), [alev@umich.edu](mailto:alev@umich.edu) and [npnayar@utexas.edu](mailto:npnayar@utexas.edu).

## Appendix A Proof and Additional Derivations

### A.1 Proof of Proposition 1

The derivation of the influence vector follows closely the steps in ?. In this appendix, we derive the influence matrix under the assumption that there is only one group for the final good consumption. The more general case with multiple groups is a straightforward extension of the current analysis.

**Demand-side linearization** The market clearing condition and the balance of payment condition require

$$P_{nj}Y_{nj} = \sum_m P_m \mathcal{F}_m \pi_{nmj}^f + \sum_m \sum_i (1 - \eta_i) P_{mi} Y_{mi} \pi_{nj,mi}^x$$

$$P_m \mathcal{F}_m = \sum_i \eta_{ni} P_{mi} Y_{mi}.$$

The log-linearized version is

$$\begin{aligned} \ln P_{nj} + \ln Y_{nj} &= \sum_m \sum_i \frac{\eta_i P_{mi} Y_{mi} \pi_{nmj}^f}{P_{nj} Y_{nj}} (\ln P_{mi} + \ln Y_{mi}) + \sum_m \frac{P_m \mathcal{F}_m \pi_{nmj}^f}{P_{nj} Y_{nj}} \ln \pi_{nmj}^f \\ &+ \sum_m \sum_i \frac{(1 - \eta_i) P_{mi} Y_{mi} \pi_{nj,mi}^x}{P_{nj} Y_{nj}} (\ln P_{mi} + \ln Y_{mi} + \ln \pi_{nj,mi}^x) \end{aligned} \quad (\text{A.1})$$

where

$$\ln \pi_{nj,mi}^x = (1 - \varepsilon) \sum_{k,l} \pi_{kl,mi}^x (\ln P_{nj} - \ln P_{kl}) \quad (\text{A.2})$$

$$\ln \pi_{nmj}^f = (1 - \gamma) \sum_{k,\ell} \pi_{km\ell}^f (\ln P_{nj} - \ln P_{k\ell}). \quad (\text{A.3})$$

Define the following share matrices:

1.  $\Psi^f$  is an  $NJ \times NJ$  matrix whose  $(nj, m)$ th element is  $\frac{\pi_{nmj}^f P_m \mathcal{F}_m}{P_{nj} Y_{nj}}$ . That is, this matrix stores the share of total revenue in the country-sector in the row that comes from final spending in the country in the column.
2.  $\Psi^x$  is an  $NJ \times NJ$  matrix whose  $(nj, mi)$ th element is  $\frac{(1 - \eta_i) \pi_{nj,mi}^x P_{mi} Y_{mi}}{P_{nj} Y_{nj}}$ . That is, this matrix stores the share of total revenue in the country-sector in the row that comes from intermediate spending in the country-sector in the column.
3.  $\Upsilon$  is an  $N \times NJ$  matrix whose  $(n, mi)$ th element is  $\frac{\eta_i P_{mi} Y_{mi}}{P_n \mathcal{F}_n}$ . That is, this matrix stores the share of value added in the country-sector in the column in total GDP of the country in the row. Note that these are zero whenever  $m \neq n$ .
4.  $\Pi^f$  is an  $N \times NJ$  matrix whose  $(m, k\ell)$ th element is  $\pi_{km\ell}^f$ . That is, this matrix stores the final expenditure share on goods coming from the column in the country in the row.

5.  $\mathbf{\Pi}^x$  is an  $NJ \times NJ$  matrix whose  $(k\ell, mi)$ th element is  $\pi_{mi,kl}^x$ . That is, this matrix stores the intermediate expenditure share on goods coming from the column in the country-sector in the row.
6.  $\mathbf{\Pi}^{\mathcal{O}}$  is an  $NJ \times N\mathcal{O}$  matrix whose  $(nj, n\ell)$ th element is  $\pi_{nj\ell}^{\mathcal{O}}$ . That is, this matrix stores the expenditure share on occupation  $\ell$  in country  $n$  sector  $j$ .

Then, equation (A.1) can be stated in matrix form:

$$\begin{aligned} \ln \mathbf{P}_t + \ln \mathbf{Y}_t = & \left( \mathbf{\Psi}^f \mathbf{\Upsilon} + \mathbf{\Psi}^x \right) (\ln \mathbf{P}_t + \ln \mathbf{Y}_t) + (1 - \gamma) \left( \text{diag} \left( \mathbf{\Psi}^f \mathbf{1} \right) - \mathbf{\Psi}^f \mathbf{\Pi}^f \right) \ln \mathbf{P}_t \\ & + (1 - \varepsilon) \left( \text{diag} \left( \mathbf{\Psi}^x \mathbf{1} \right) - \mathbf{\Psi}^x \mathbf{\Pi}^x \right) \ln \mathbf{P}_t. \end{aligned}$$

This allows us to express prices as a function of quantities,  $\ln \mathbf{P} = \ln \mathbf{Y}$ , where<sup>1</sup>

$$\begin{aligned} \mathcal{P} = & - \left( \mathbf{I} - \mathcal{M} \right)^+ \left( \mathbf{I} - \mathbf{\Psi}^f \mathbf{\Upsilon} - \mathbf{\Psi}^x \right) \\ \mathcal{M} = & \mathbf{\Psi}^f \mathbf{\Upsilon} + \mathbf{\Psi}^x + (1 - \rho) \left( \text{diag} \left( \mathbf{\Psi}^f \mathbf{1} \right) - \mathbf{\Psi}^f \mathbf{\Pi}^f \right) + (1 - \varepsilon) \left( \text{diag} \left( \mathbf{\Psi}^x \mathbf{1} \right) - \mathbf{\Psi}^x \mathbf{\Pi}^x \right). \end{aligned}$$

Turn to the labor market. The log-linearized intratemporal Euler condition for the labor supply in occupation  $\ell$  country  $n$  is

$$\ln L_{n\ell} = \psi (\ln W_{n\ell} - \ln P_n) + (1 + \psi) \ln \xi_{n\ell}.$$

The labor demand for occupation  $\ell$  in sector  $j$  country  $n$ ,  $L_{nj\ell}$ , is

$$\ln L_{nj\ell} = \ln Y_{nj} + \ln P_{nj} - \ln W_{n\ell} + (1 - \kappa) \sum_{\iota} \pi_{nj\iota}^{\mathcal{O}} (\ln W_{n\ell} - \ln W_{n\iota})$$

The labor market clearing condition for occupation  $\ell$  is

$$\ln L_{n\ell} = \sum_{j=1}^N \Lambda_{nj\ell} \ln L_{nj\ell}$$

Equating labor demand and labor supply leads to

$$\psi (\ln W_{n\ell} - \ln P_n) + (1 + \psi) \ln \xi_{n\ell} = \sum_{j=1}^N \Lambda_{nj\ell} (\ln Y_{nj} + \ln P_{nj}) - \ln W_{n\ell} + \sum_{j=1}^N \sum_{\iota=1}^{\mathcal{O}} (1 - \kappa) \Lambda_{nj\ell} \pi_{nj\iota}^{\mathcal{O}} (\ln W_{n\ell} - \ln W_{n\iota}) \quad (\text{A.4})$$

---

<sup>1</sup>The + sign stands for the Moore-Penrose inverse. The non-invertibility is a consequence of the fact that the vector of prices is only defined up to a numeraire.

In matrix form, it can be written as

$$\Delta \ln \mathbf{W} = -\ln \boldsymbol{\xi} + \frac{1}{1+\psi} \boldsymbol{\Lambda} (\ln \mathbf{Y} + \ln \mathbf{P}) + \frac{\psi}{1+\psi} (\mathbf{1} \otimes \boldsymbol{\Pi}^f) \ln \mathbf{P} \quad (\text{A.5})$$

where

$$\Delta = \frac{\kappa + \psi}{1 + \psi} \mathbf{I} + \frac{1 - \kappa}{1 + \psi} \boldsymbol{\Lambda} \boldsymbol{\Pi}^{\mathcal{O}}. \quad (\text{A.6})$$

The production function in sector  $j$  implies that

$$\ln Y_{nj} = \eta_j (1 - \alpha_j) \ln H_{nj} + (1 - \eta_j) \ln X_{nj}.$$

The first-order conditions with respect to the composite labor and intermediate goods lead to

$$\begin{aligned} \ln H_{nj} &= \ln Y_{nj} + \ln P_{nj} - \sum_{\iota} \pi_{nj\iota}^{\mathcal{O}} \ln W_{n\iota} \\ \ln X_{nj} &= \ln Y_{nj} + \ln P_{nj} - \sum_{k,i} \pi_{ki,nj}^x \ln P_{ki}. \end{aligned}$$

Combining the production function and the first-order conditions give

$$\ln \mathbf{Y} = \left( \boldsymbol{\eta} - (\mathbf{I} - \boldsymbol{\eta})(\mathbf{I} - \boldsymbol{\Pi}^x) \boldsymbol{\mathcal{P}} \right)^{-1} \boldsymbol{\eta} (\mathbf{I} - \boldsymbol{\alpha}) \ln \mathbf{H} \quad (\text{A.7})$$

$$\ln \mathbf{H} = \ln \mathbf{Y} + \ln \mathbf{P} - \boldsymbol{\Pi}^{\mathcal{O}} \ln \mathbf{W}. \quad (\text{A.8})$$

The influence matrix can be obtained by combining conditions (A.5) to (A.8):

$$\ln \mathbf{H} = \left( \mathbf{I} - \left( \mathbf{I} + \boldsymbol{\mathcal{P}} - \frac{1}{1+\psi} \boldsymbol{\Pi}^{\mathcal{O}} \boldsymbol{\Delta}^{-1} \left( \boldsymbol{\Lambda} + \boldsymbol{\Lambda} \boldsymbol{\mathcal{P}} + \psi \boldsymbol{\Pi}^f \boldsymbol{\mathcal{P}} \right) \right) \right) \left( \boldsymbol{\eta} - (\mathbf{I} - \boldsymbol{\eta})(\mathbf{I} - \boldsymbol{\Pi}^x) \boldsymbol{\mathcal{P}} \right)^{-1} \boldsymbol{\eta} (\mathbf{I} - \boldsymbol{\alpha})^{-1} \boldsymbol{\Pi}^{\mathcal{O}} \boldsymbol{\Delta}^{-1} \ln \boldsymbol{\xi}.$$

## A.2 Alternative Shock Specification

Suppose the labor supply shocks appear as efficiency shocks as in equation (2). The household problem becomes

$$\max_{\mathcal{F}_n, \{L_{n\ell}\}} \mathcal{F}_n - \sum_{\ell=1}^{\mathcal{O}} \frac{1}{1 + \frac{1}{\psi}} L_{n\ell}^{1 + \frac{1}{\psi}}$$

subject to

$$P_n \mathcal{F}_n = \sum_{\ell=1}^{\mathcal{O}} W_{n\ell} \xi_{n\ell} L_{n\ell} + \sum_{j=1}^J R_{nj} K_{nj}$$

where  $\xi_{n\ell}$  stands for the efficiency units. With this specification, the optimal labor supply condition becomes

$$L_{n\ell}^{\frac{1}{\psi}} = \frac{W_{n\ell}}{P_n} \xi_{n\ell}.$$

Now consider the log-linearized conditions in labor markets. The changes of labor supply in occupation  $\ell$  country  $n$  is

$$\ln L_{n\ell} = \psi(\ln W_{n\ell} - \ln P_n + \ln \xi_{n\ell}).$$

The labor demand for occupation  $\ell$  in sector  $j$  country  $n$ ,  $L_{nj\ell}$ , is the same as before (but now the demand  $\ln L_{nj\ell}$  refers to efficiency units rather than physical hours):

$$\ln L_{nj\ell} = \ln Y_{nj} + \ln P_{nj} - \ln W_{n\ell} + (1 - \kappa) \sum_{\iota} \pi_{nj\iota}^{\mathcal{O}} (\ln W_{n\ell} - \ln W_{n\iota}).$$

Note that the effective total labor supply for occupation  $\ell$  now becomes  $\ln L_{n\ell} + \ln \xi_{n\ell}$ , which leads to the following labor market clearing condition

$$\ln L_{n\ell} + \ln \xi_{n\ell} = \sum_{j=1}^N \Lambda_{nj\ell} \ln L_{nj\ell}.$$

Equating labor demand and labor supply leads to the following condition for wage movements

$$\psi(\ln W_{n\ell} - \ln P_n) + (\psi + 1) \ln \xi_{n\ell} = \sum_{j=1}^N \Lambda_{nj\ell} (\ln Y_{nj} + \ln P_{nj}) - \ln W_{n\ell} + \sum_{j=1}^N \sum_{\iota=1}^{\mathcal{O}} (1 - \kappa) \Lambda_{nj\ell} \pi_{nj\iota}^{\mathcal{O}} (\ln W_{n\ell} - \ln W_{n\iota}) \quad (\text{A.9})$$

The condition for the wage movement (A.9) is exactly the same condition (A.4) for the model where the shocks appear as labor disutility. Therefore, the responses of outputs, GDP, and total labor demand at each sector will be identical under these two labor shock formulations.

### A.3 Changes in Real Consumption

Due to the balanced trade assumption, we have  $P_n \mathcal{F}_n = \left( \sum_j P_{nj} Y_{nj} - P_{nj}^x X_{nj} \right)$ . The change in real consumption is

$$\begin{aligned} \ln \mathcal{F}_n &= \sum_j \left( \frac{P_{nj} Y_{nj}}{V_n} (\ln Y_{nj} + \ln P_{nj}) - \frac{P_{nj}^x X_{nj}}{V_n} (\ln X_{nj} + \ln P_{nj}^x) \right) - \ln P_n \\ &= \sum_j \frac{P_{nj} Y_{nj}}{V_n} \left( \ln Y_{nj} + \ln P_{nj} - \frac{P_{nj}^x X_{nj}}{P_{nj} Y_{nj}} (\ln X_{nj} + \ln P_{nj}^x) \right) - \ln P_n \\ &= \sum_j \frac{P_{nj} Y_{nj}}{V_n} (\ln Z_{njt} + \eta_j \alpha_j \ln H_{njt} + (1 - \eta_j) \ln X_{njt} + \ln P_{nj} - (1 - \eta_j) \ln X_{nj} - (1 - \eta_j) \ln P_{nj}^x) - \ln P_n \\ &= \ln V_n + \sum_j \frac{P_{nj} Y_{nj}}{V_n} (\ln P_{nj} - (1 - \eta_j) \ln P_{nj}^x) - \ln P_n. \end{aligned}$$

That is, the change in real consumption equals to the change in real GDP plus the change in relative prices.

## Appendix B Data and Robustness

### B.1 Country, Sector, and Occupations Sample

Table A1 lists the occupations and their work-from-home intensities. Table A2 lists the countries in our sample, together with the country codes used in the graphs to report results. Table A3 displays the sectors with their corresponding ISIC rev. 4 composition. Table A4 lists the sectoral work-from-home shares.

TABLE A1: Occupation Sample

| Code | Description                                                | Work from home intensity |
|------|------------------------------------------------------------|--------------------------|
| 11   | Management Occupations                                     | 0.900                    |
| 13   | Business and Financial Operations Occupations              | 0.895                    |
| 15   | Computer and Mathematical Occupations                      | 1.000                    |
| 17   | Architecture and Engineering Occupations                   | 0.645                    |
| 19   | Life, Physical, and Social Science Occupations             | 0.606                    |
| 21   | Community and Social Service Occupations                   | 0.404                    |
| 23   | Legal Occupations                                          | 0.971                    |
| 25   | Education, Training, and Library Occupations               | 0.989                    |
| 27   | Arts, Design, Entertainment, Sports, and Media Occupations | 0.823                    |
| 29   | Healthcare Practitioners and Technical Occupations         | 0.051                    |
| 31   | Healthcare Support Occupations                             | 0.022                    |
| 33   | Protective Service Occupations                             | 0.049                    |
| 35   | Food Preparation and Serving Related Occupations           | 0.000                    |
| 37   | Building and Grounds Cleaning and Maintenance Occupations  | 0.000                    |
| 39   | Personal Care and Service Occupations                      | 0.248                    |
| 41   | Sales and Related Occupations                              | 0.485                    |
| 43   | Office and Administrative Support Occupations              | 0.697                    |
| 45   | Farming, Fishing, and Forestry Occupations                 | 0.021                    |
| 47   | Construction and Extraction Occupations                    | 0.002                    |
| 49   | Installation, Maintenance, and Repair Occupations          | 0.004                    |
| 51   | Production Occupations                                     | 0.009                    |
| 53   | Transportation and Material Moving Occupations             | 0.058                    |
| 99   | Health Composite                                           | 0.254                    |

**Notes:** This table list the occupations in our quantitative analysis. The health composite occupation is composed of the mix of occupations used by the Health *sector*. We display the share of work that can be done from home in this table for the health composite, but we do not use it in our quantitative analysis as health workers are assumed not to be subject to the lockdown.

TABLE A2: Country Sample

| Code | Name              | Code | Name              |
|------|-------------------|------|-------------------|
| ARG  | Argentina         | KAZ  | Kazakhstan        |
| AUS  | Australia         | KHM  | Cambodia          |
| AUT  | Austria           | KOR  | Korea             |
| BEL  | Belgium           | LTU  | Lithuania         |
| BGR  | Bulgaria          | LUX  | Luxembourg        |
| BRA  | Brazil            | LVA  | Latvia            |
| BRN  | Brunei Darussalam | MAR  | Morocco           |
| CAN  | Canada            | MEX  | Mexico            |
| CHE  | Switzerland       | MLT  | Malta             |
| CHL  | Chile             | MYS  | Malaysia          |
| CHN  | China             | NLD  | Netherlands       |
| COL  | Colombia          | NOR  | Norway            |
| CRI  | Costa Rica        | NZL  | New Zealand       |
| CYP  | Cyprus            | PER  | Peru              |
| CZE  | Czech Republic    | PHL  | Philippines       |
| DEU  | Germany           | POL  | Poland            |
| DNK  | Denmark           | PRT  | Portugal          |
| ESP  | Spain             | ROU  | Romania           |
| EST  | Estonia           | RUS  | Russia            |
| FIN  | Finland           | SAU  | Saudi Arabia      |
| FRA  | France            | SGP  | Singapore         |
| GBR  | United Kingdom    | SVK  | Slovakia          |
| GRC  | Greece            | SVN  | Slovenia          |
| HKG  | Hong Kong         | SWE  | Sweden            |
| HRV  | Croatia           | THA  | Thailand          |
| HUN  | Hungary           | TUN  | Tunisia           |
| IDN  | Indonesia         | TUR  | Turkey            |
| IND  | India             | TWN  | Taiwan            |
| IRL  | Ireland           | USA  | United States     |
| ISL  | Iceland           | VNM  | Viet Nam          |
| ISR  | Israel            | ZAF  | South Africa      |
| ITA  | Italy             |      |                   |
| JPN  | Japan             | ROW  | Rest of the World |

TABLE A3: Sector Sample

| Code  | Description                                                            | Sector<br>grouping | ISIC 2d codes                                        |
|-------|------------------------------------------------------------------------|--------------------|------------------------------------------------------|
| 01T03 | Agriculture, forestry and fishing                                      | G                  | 01, 02, 03                                           |
| 05T09 | Mining and Quarrying                                                   | G                  | 05, 06,07, 08, 09                                    |
| 10T12 | Food products, beverages and tobacco                                   | G                  | 10, 11, 12                                           |
| 13T15 | Textiles, wearing apparel, leather and related products                | G                  | 13, 14, 15                                           |
| 16    | Wood and products of wood and cork                                     | G                  | 16                                                   |
| 17T18 | Paper products and printing                                            | G                  | 17, 18                                               |
| 19    | Coke and refined petroleum products                                    | G                  | 19                                                   |
| 20T21 | Chemicals and pharmaceutical products                                  | G                  | 20, 21                                               |
| 22    | Rubber and plastic products                                            | G                  | 22                                                   |
| 23    | Other non-metallic mineral products                                    | G                  | 23                                                   |
| 24    | Basic metals                                                           | G                  | 24                                                   |
| 25    | Fabricated metal products                                              | G                  | 25                                                   |
| 26    | Computer, electronic and optical products                              | G                  | 26                                                   |
| 27    | Electrical equipment                                                   | G                  | 27                                                   |
| 28    | Machinery and equipment, nec                                           | G                  | 28                                                   |
| 29    | Motor vehicles, trailers and semi-trailers                             | G                  | 29                                                   |
| 30    | Other transport equipment                                              | G                  | 30, 31, 32, 33                                       |
| 31T33 | Other manufacturing; repair and installation<br>of machinery and eqpmt | G                  | G                                                    |
| 35T39 | Electricity, gas, water, waste                                         | S                  | 35, 36, 37, 38, 39                                   |
| 41T43 | Construction                                                           | S                  | 41, 42, 43                                           |
| 45T47 | Wholesale and retail trade; repair of motor vehicles                   | S                  | 45, 46, 47                                           |
| 49T53 | Transportation and storage                                             | S                  | 49, 50, 51, 52, 53                                   |
| 55T56 | Accommodation and food services                                        | S                  | 55, 56                                               |
| 58T60 | Publishing, audiovisual and broadcasting activities                    | S                  | 58, 59, 60                                           |
| 61    | Telecommunications                                                     | S                  | 61                                                   |
| 62T63 | IT and other information services                                      | S                  | 62, 63                                               |
| 64T66 | Financial and insurance activities                                     | S                  | 64, 65, 66                                           |
| 68    | Real estate activities                                                 | S                  | 68                                                   |
| 69T82 | Other business sector services                                         | S                  | 69, 70, 71, 72, 73, 74, 75<br>77, 78, 79, 80, 81, 82 |
| 84    | Public admin. and defense; compulsory social security                  | S                  | 84                                                   |
| 85    | Education                                                              | S                  | 85                                                   |
| 86T88 | Human health and social work                                           | H                  | 86, 87, 88                                           |
| 90T98 | Arts, entertainment, other services, households activities             | S                  | 90, 91, 92, 93,94<br>95, 96,97, 98                   |

**Notes:** This table list the sectors in our quantitative analysis. The third column displays the sector classification into three groups: goods (G), services (S) and health (H).



TABLE A4: Sectoral Shares of Work that Can Be Done at Home

| Sector code | Description                                                             | Work from home share | Exposure to work from home |
|-------------|-------------------------------------------------------------------------|----------------------|----------------------------|
| 01T03       | Agriculture, forestry and fishing                                       | 0.134                | 0.113                      |
| 05T09       | Mining and Quarrying                                                    | 0.363                | 0.134                      |
| 10T12       | Food products, beverages and tobacco                                    | 0.240                | 0.102                      |
| 13T15       | Textiles, wearing apparel, leather and related products                 | 0.332                | 0.146                      |
| 16          | Wood and products of wood and cork                                      | 0.232                | 0.131                      |
| 17T18       | Paper products and printing                                             | 0.324                | 0.122                      |
| 19          | Coke and refined petroleum products                                     | 0.349                | 0.032                      |
| 20T21       | Chemicals and pharmaceutical products                                   | 0.471                | 0.069                      |
| 22          | Rubber and plastic products                                             | 0.296                | 0.132                      |
| 23          | Other non-metallic mineral products                                     | 0.291                | 0.133                      |
| 24          | Basic metals                                                            | 0.268                | 0.088                      |
| 25          | Fabricated metal products                                               | 0.305                | 0.164                      |
| 26          | Computer, electronic and optical products                               | 0.667                | 0.064                      |
| 27          | Electrical equipment                                                    | 0.420                | 0.112                      |
| 28          | Machinery and equipment, nec                                            | 0.396                | 0.132                      |
| 29          | Motor vehicles, trailers and semi-trailers                              | 0.230                | 0.112                      |
| 30          | Other transport equipment                                               | 0.496                | 0.109                      |
| 31T33       | Other manufacturing; repair and installation of machinery and equipment | 0.295                | 0.171                      |
| 35T39       | Electricity, gas, water, waste                                          | 0.377                | 0.085                      |
| 41T43       | Construction                                                            | 0.242                | 0.163                      |
| 45T47       | Wholesale and retail trade; repair of motor vehicles                    | 0.475                | 0.162                      |
| 49T53       | Transportation and storage                                              | 0.299                | 0.159                      |
| 55T56       | Accommodation and food services                                         | 0.111                | 0.258                      |
| 58T60       | Publishing, audiovisual and broadcasting activities                     | 0.808                | 0.047                      |
| 61          | Telecommunications                                                      | 0.599                | 0.060                      |
| 62T63       | IT and other information services                                       | 0.903                | 0.033                      |
| 64T66       | Financial and insurance activities                                      | 0.786                | 0.054                      |
| 68          | Real estate activities                                                  | 0.577                | 0.017                      |
| 69T82       | Other business sector services                                          | 0.638                | 0.117                      |
| 84          | Public admin. and defense; compulsory social security                   | 0.485                | 0.259                      |
| 85          | Education                                                               | 0.828                | 0.112                      |
| 86T88       | Human health and social work                                            | 0.247                | 0.377                      |
| 90T98       | Arts, entertainment, other services, households activities              | 0.479                | 0.181                      |
| Average     |                                                                         | 0.423                | 0.126                      |

**Notes:** The first column reports the share of the labor input that can be provided from home, by sector. The sectoral measure is computed as an average of  $\alpha_j$ 's work from home intensity at the occupational level, weighted using sectoral level expenditure shares on each occupation. The second column reports the sectoral exposure, defined as the share of total output accounted for by labor that cannot be done from home,  $(1 - \alpha_j)\eta_j(1 - \text{work from home}_j)$ .

## B.2 Curving of the Stringency Index

We obtained Industrial Production (IP) data up to April 2020 for 39 of our 64 countries from the OECD, Eurostat, and some national statistical agencies (for Argentina, India, Taiwan, and Australia). The April 2020 IP contraction is defined as the log difference with respect to the maximum 3-month moving average in the previous 12 months (meant to capture contraction relative to the peak). In practice, we drop the countries with the three biggest and smallest falls to avoid extreme values in the lognormal fit.

To curve the Government Response Tracker (GRT), we use the inverse CDF of a lognormal distribution with parameters  $\mu$  and  $\sigma$ , and attribute a stringency to each country equal to the quantile corresponding to its empirical GRT CDF. We then solve for the change in manufacturing output using the resulting labor supply shock, and target the average change in IP across countries, and the range between the maximal and minimal change. The curving results in a lognormal fit with parameters  $\mu = -0.302$  and  $\sigma = 0.531$ . It leaves the average stringency virtually unchanged at 0.805 instead of 0.806, but increases the dispersion.

## B.3 Additional Results

**Fit of the linear approximation** Figure A1 assesses the fit of the linear approximation used in the main results by plotting the baseline changes in GDP against changes in GDP computed using exact hat algebra following Dekle, Eaton, and Kortum (2008)’s procedure. The dots all lie close to the 45 degree line, implying that the linear approximation is a good fit. Table A7 summarizes the average declines in GDP in the baseline and under alternative elasticities.

**Country-level results** Tables A5 and A6 display the country-specific results of our baseline trade scenario and our main renationalization counterfactual.

**Reopening** Figure A2 displays the entire matrix of other countries (“destination”)’ GDP changes when a “source” country reopens.

FIGURE A1: Fit of the Linear Approximation

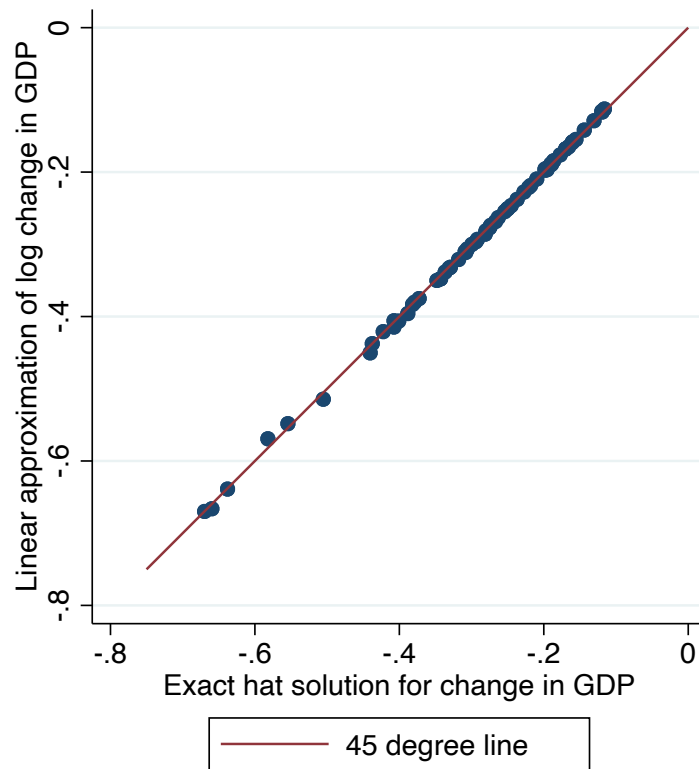

**Notes:** This figure shows a scatterplot of the reaction of real GDP computed using the linear approximation against that computed using exact hat algebra following Dekle, Eaton, and Kortum (2008)'s procedure.

TABLE A5: Country-level detailed results (1)

| Country | Trade<br>( $\ln V_n$ ) | Transmission<br>( $\mathcal{T}_n$ ) | Domestic<br>shock ( $\mathcal{D}_n$ ) | Renationalized<br>( $\ln V_n^R$ ) |
|---------|------------------------|-------------------------------------|---------------------------------------|-----------------------------------|
| ARG     | -0.666                 | -0.029                              | -0.638                                | -0.732                            |
| AUS     | -0.165                 | -0.047                              | -0.118                                | -0.146                            |
| AUT     | -0.296                 | -0.063                              | -0.233                                | -0.301                            |
| BEL     | -0.251                 | -0.069                              | -0.182                                | -0.247                            |
| BGR     | -0.194                 | -0.069                              | -0.125                                | -0.164                            |
| BRA     | -0.219                 | -0.037                              | -0.182                                | -0.215                            |
| BRN     | -0.158                 | -0.071                              | -0.087                                | -0.119                            |
| CAN     | -0.190                 | -0.054                              | -0.135                                | -0.177                            |
| CHE     | -0.210                 | -0.059                              | -0.150                                | -0.200                            |
| CHL     | -0.184                 | -0.068                              | -0.116                                | -0.158                            |
| CHN     | -0.293                 | -0.027                              | -0.266                                | -0.299                            |
| COL     | -0.380                 | -0.058                              | -0.322                                | -0.417                            |
| CRI     | -0.246                 | -0.056                              | -0.191                                | -0.242                            |
| CYP     | -0.406                 | -0.066                              | -0.340                                | -0.441                            |
| CZE     | -0.277                 | -0.064                              | -0.213                                | -0.269                            |
| DEU     | -0.176                 | -0.054                              | -0.122                                | -0.150                            |
| DNK     | -0.159                 | -0.058                              | -0.101                                | -0.129                            |
| ESP     | -0.311                 | -0.054                              | -0.257                                | -0.316                            |
| EST     | -0.238                 | -0.072                              | -0.165                                | -0.221                            |
| FIN     | -0.142                 | -0.053                              | -0.089                                | -0.114                            |
| FRA     | -0.348                 | -0.052                              | -0.296                                | -0.366                            |
| GBR     | -0.189                 | -0.054                              | -0.135                                | -0.171                            |
| GRC     | -0.286                 | -0.051                              | -0.234                                | -0.275                            |
| HKG     | -0.168                 | -0.056                              | -0.112                                | -0.142                            |
| HRV     | -0.514                 | -0.065                              | -0.449                                | -0.552                            |
| HUN     | -0.228                 | -0.070                              | -0.158                                | -0.202                            |
| IDN     | -0.274                 | -0.046                              | -0.228                                | -0.274                            |
| IND     | -0.670                 | -0.042                              | -0.628                                | -0.742                            |
| IRL     | -0.306                 | -0.060                              | -0.246                                | -0.360                            |
| ISL     | -0.129                 | -0.053                              | -0.076                                | -0.095                            |

**Notes:** This table reports the country-level GDP changes (first column), decomposed into transmission (second column) and own shock (third column) for the baseline scenario, and for the renationalized scenario (last column). Part 1.

TABLE A6: Country-level detailed results (2)

| Country | Trade<br>( $\ln V_n$ ) | Transmission<br>( $\mathcal{T}_n$ ) | Domestic<br>shock ( $\mathcal{D}_n$ ) | Renationalized<br>( $\ln V_n^R$ ) |
|---------|------------------------|-------------------------------------|---------------------------------------|-----------------------------------|
| ISR     | -0.396                 | -0.053                              | -0.343                                | -0.427                            |
| ITA     | -0.415                 | -0.045                              | -0.369                                | -0.437                            |
| JPN     | -0.117                 | -0.038                              | -0.079                                | -0.092                            |
| KAZ     | -0.350                 | -0.067                              | -0.283                                | -0.376                            |
| KHM     | -0.196                 | -0.066                              | -0.129                                | -0.168                            |
| KOR     | -0.277                 | -0.047                              | -0.229                                | -0.285                            |
| LTU     | -0.333                 | -0.073                              | -0.260                                | -0.341                            |
| LUX     | -0.197                 | -0.060                              | -0.136                                | -0.199                            |
| LVA     | -0.168                 | -0.067                              | -0.101                                | -0.131                            |
| MAR     | -0.438                 | -0.070                              | -0.368                                | -0.475                            |
| MEX     | -0.268                 | -0.049                              | -0.220                                | -0.271                            |
| MLT     | -0.255                 | -0.083                              | -0.172                                | -0.259                            |
| MYS     | -0.189                 | -0.058                              | -0.130                                | -0.168                            |
| NLD     | -0.221                 | -0.057                              | -0.164                                | -0.212                            |
| NOR     | -0.197                 | -0.059                              | -0.138                                | -0.181                            |
| NZL     | -0.450                 | -0.041                              | -0.410                                | -0.487                            |
| PER     | -0.548                 | -0.062                              | -0.486                                | -0.636                            |
| PHL     | -0.639                 | -0.049                              | -0.590                                | -0.719                            |
| POL     | -0.310                 | -0.065                              | -0.245                                | -0.318                            |
| PRT     | -0.348                 | -0.066                              | -0.281                                | -0.352                            |
| ROU     | -0.332                 | -0.060                              | -0.272                                | -0.343                            |
| RUS     | -0.321                 | -0.044                              | -0.277                                | -0.335                            |
| SAU     | -0.406                 | -0.078                              | -0.328                                | -0.479                            |
| SGP     | -0.281                 | -0.060                              | -0.221                                | -0.300                            |
| SVK     | -0.338                 | -0.074                              | -0.265                                | -0.350                            |
| SVN     | -0.383                 | -0.077                              | -0.306                                | -0.409                            |
| SWE     | -0.113                 | -0.056                              | -0.057                                | -0.072                            |
| THA     | -0.300                 | -0.059                              | -0.241                                | -0.304                            |
| TUN     | -0.421                 | -0.083                              | -0.338                                | -0.457                            |
| TUR     | -0.250                 | -0.051                              | -0.199                                | -0.238                            |
| TWN     | -0.116                 | -0.055                              | -0.061                                | -0.081                            |
| USA     | -0.155                 | -0.035                              | -0.120                                | -0.137                            |
| VNM     | -0.569                 | -0.063                              | -0.507                                | -0.632                            |
| ZAF     | -0.375                 | -0.062                              | -0.313                                | -0.397                            |

**Notes:** This table reports the country-level GDP changes (first column), decomposed into transmission (second column) and own shock (third column) for the baseline scenario, and for the renationalized scenario (last column). Part 2.

TABLE A7: Alternative Quantifications Summary

|                                        | Average drop in GDP |                   | Share of<br>trans. | $\ln V - \ln V^R$ | Corr. with<br>baseline |
|----------------------------------------|---------------------|-------------------|--------------------|-------------------|------------------------|
|                                        | Trade               | Renationalized    |                    |                   |                        |
| Baseline                               | -29.6%<br>(13.3%)   | -30.2%<br>(16.3%) | 23.3%<br>(10.2%)   | 0.6%<br>(3.2%)    | –                      |
| Baseline, real<br>consumption*         | -27.6%<br>(7.3%)    | -30.2%<br>(16.3%) | 64.3%<br>(16.5%)   | 2.6%<br>(9.6%)    | 0.98                   |
| Baseline, interm.<br>renationalization | -29.6%<br>(13.3%)   | -29.9%<br>(15.2%) | 23.3%<br>(10.2%)   | 0.3%<br>(2.0%)    | 0.98                   |
| Country specific<br>WFH                | -30.9%<br>(16.5%)   | -31.5%<br>(20.1%) | 24.7%<br>(12.0%)   | 0.5%<br>(3.7%)    | 0.96                   |
| Varying the Frisch elasticity          |                     |                   |                    |                   |                        |
| $\psi = 1$                             | -26.5%<br>(12.7%)   | -26.8%<br>(14.6%) | 17.2%<br>(8.1%)    | 0.3%<br>(2.0%)    | 0.99                   |
| $\psi = 0.2$                           | -21.9%<br>(11.6%)   | -21.8%<br>(12.0%) | 5.6%<br>(3.1%)     | -0.1%<br>(0.7%)   | 0.75                   |
| $\psi = 0.01$                          | -20.3%<br>(11.1%)   | -20.0%<br>(11.0%) | 0.3%<br>(0.2%)     | -0.2%<br>(0.5%)   | 0.05                   |
| Additional sensitivity                 |                     |                   |                    |                   |                        |
| $\rho = 1$                             | -29.6%<br>(13.5%)   | -30.0%<br>(16.3%) | 21.9%<br>(9.8%)    | 0.5%<br>(2.9%)    | 0.99                   |
| $\varepsilon = 1$                      | -30.1%<br>(14.5%)   | -30.3%<br>(16.4%) | 15.7%<br>(7.8%)    | 0.2%<br>(2.0%)    | 0.98                   |
| $\kappa = 0.2$                         | -29.6%<br>(13.4%)   | -30.2%<br>(16.3%) | 23.3%<br>(10.2%)   | 0.6%<br>(3.1%)    | 0.99                   |
| $\gamma = 0.5$                         | -27.7%<br>(10.9%)   | -29.4%<br>(17.1%) | 34.6%<br>(12.7%)   | 1.7%<br>(8.5%)    | 0.82                   |
| Unscaled GRT                           | -30.2%<br>(4.8%)    | -30.0%<br>(5.9%)  | 22.6%<br>(5.9%)    | -0.2%<br>(1.3%)   | 0.82                   |
| Sector-specific<br>labor               | -29.5%<br>(13.1%)   | -29.8%<br>(15.9%) | 23.3%<br>(10.0%)   | 0.3%<br>(3.0%)    | 0.99                   |

**Notes:** \*: The numbers in this row are for real consumption rather than GDP. This table reports summary statistics of the results under alternative elasticities. The table reports cross-country mean changes in GDP under trade (first column) and renationalized supply chains (second column), the share of transmission under trade (third column) and the difference in GDP change between trade and renationalized scenario (fourth column). In parentheses under each mean is the standard deviation in that value across countries. The last column reports the correlation between the robustness  $\ln V - \ln V^R$  and the baseline  $\ln V - \ln V^R$  across countries.

FIGURE A2: GDP Changes due to Unilateral Reopening

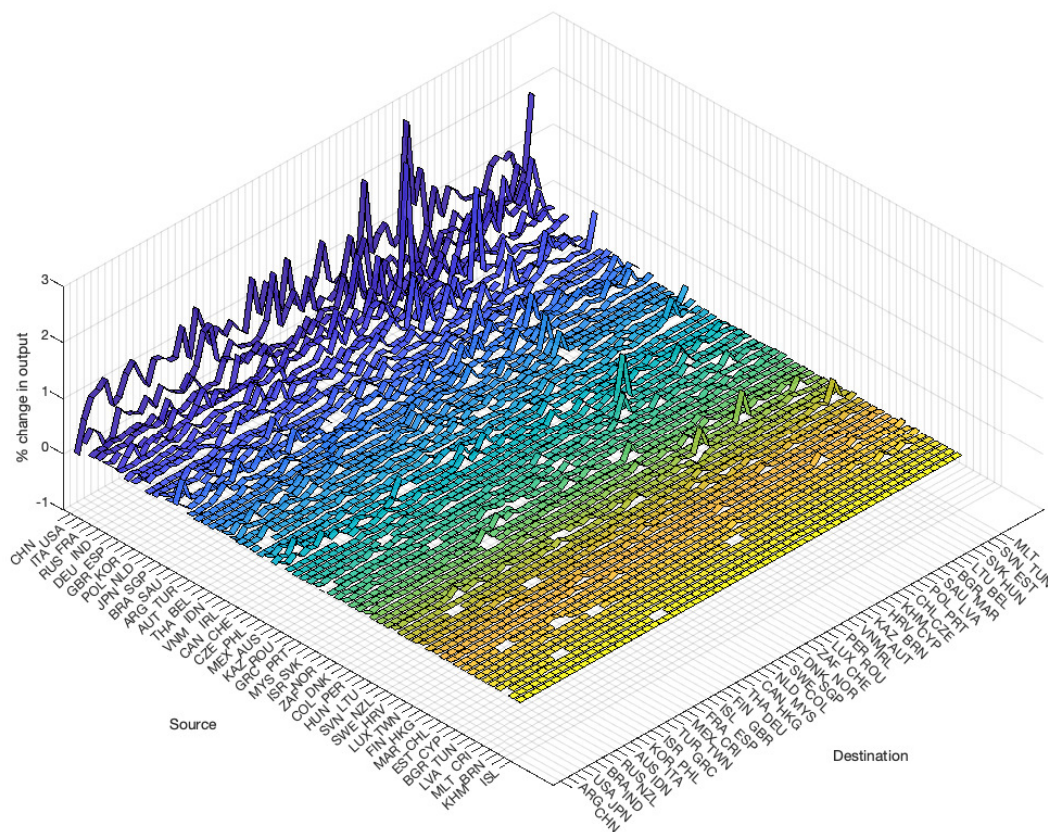

**Notes:** This figure displays the change in real GDP in countries on the “Destination” axis resulting from ending the lockdowns of the country on the “Source” axis. Impacts of ending lockdowns on own GDP are omitted.
